# Supplementary material
Source: publisher figshare collection journal article supplement (https://acs.figshare.com/ndownloader/files/5305117)
Supplement: Supplementary file 1 [file 5305117]

## Supporting Information

### Self-Assembled Epitaxial Au-Oxide Vertically Aligned Nanocomposites for Nanoscale Metamaterials

Leigang Li<sup>1</sup>, Liuyang Sun<sup>2</sup>, Juan Sebastian Gomez-Diaz<sup>3</sup>, Nicki L. Hogan<sup>4</sup>, Ping Lu<sup>5</sup>, Fauzia Khatkhatay<sup>6</sup>, Wenrui Zhang<sup>1</sup>, Jie Jian<sup>6</sup>, Jijie Huang<sup>1</sup>, Qing Su<sup>1</sup>, Meng Fan<sup>6</sup>, Clement Jacob<sup>6</sup>, Jin Li<sup>7</sup>, Xinghang Zhang<sup>7</sup>, Quanxi Jia<sup>8</sup>, Matthew Sheldon<sup>1,4</sup>, Andrea Alù<sup>3</sup>, Xiaoqin Li<sup>2</sup>, and Haiyan Wang<sup>1,6\*</sup>

<sup>1</sup>Department of Materials Science and Engineering, Texas A&M University, College Station, Texas 77843, United States

<sup>2</sup>Department of Physics and the Center for Complex Quantum Systems, The University of Texas at Austin, Austin, Texas 78712, United States

<sup>3</sup>Department of Electrical and Computer Engineering, The University of Texas at Austin, Austin, Texas 78712, United States

<sup>4</sup>Department of Chemistry, Texas A&M University, College Station, Texas 77843, United States

<sup>5</sup>Sandia National Laboratories, Albuquerque, New Mexico 87185, United States

<sup>6</sup>Department of Electrical and Computer Engineering, Texas A&M University, College Station, Texas 77843, United States

<sup>7</sup>Department of Mechanical Engineering, Texas A&M University, College Station, Texas 77843, United States

<sup>8</sup>Center for Integrated Nanotechnologies (CINT), Los Alamos National Laboratory, Los Alamos, New Mexico 87545, United States

Using pulsed laser deposition, we fabricated metal-oxide nanocomposite films with vertically aligned Au nanopillars (~ 20 nm in diameter) embedded in various oxide matrices with high epitaxial quality. The supplementary data below summarizes the statistical pillar dimension distribution, nanopillar density tuning, nanopillar growth on different substrates, and large-scale uniformity of the nanopillars.

\*To whom correspondence should be addressed. E-mail: [wangh@ece.tamu.edu](mailto:wangh@ece.tamu.edu)

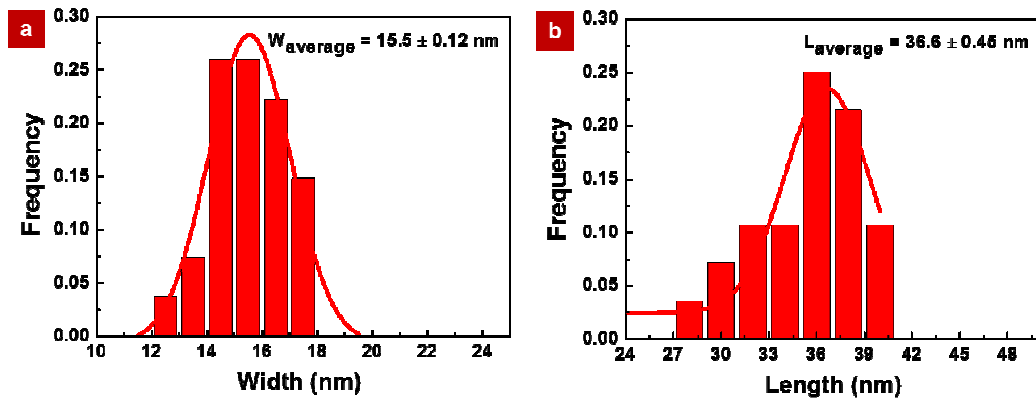

**Figure S1.** Statistical size distribution of the (a) width and (b) length of the rectangular shaped Au nanopillars in BaTiO<sub>3</sub> (BTO) matrix corresponding to the sample in Figure 3 of the manuscript.

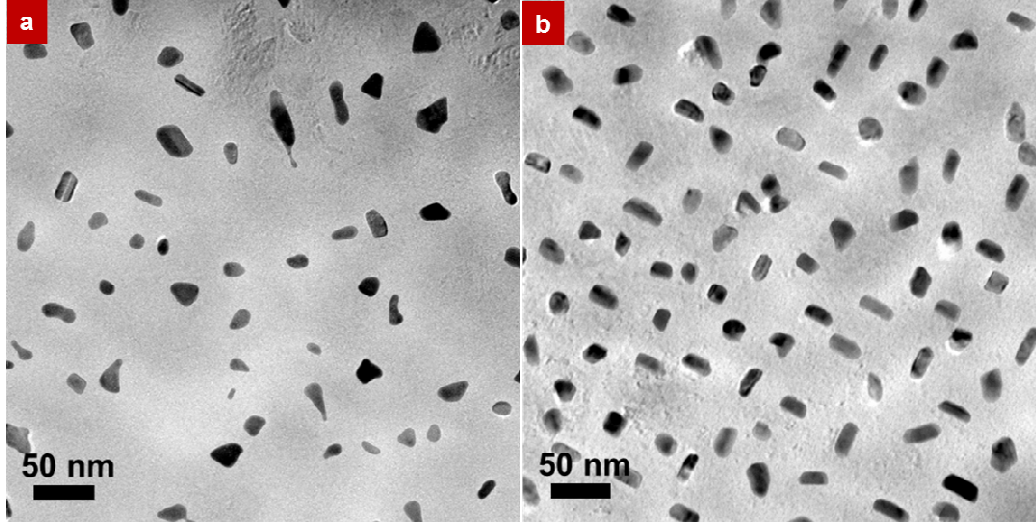

**Figure S2.** Plan-view transmission electron microscopy (TEM) images of epitaxial Au-BTO thin films grown on  $\text{SrTiO}_3$  (STO) (001) substrate with tunable Au nanopillar densities. (a) a lower areal density of  $\sim 3.1 \times 10^{10} \text{ cm}^{-2}$  and (b) a higher areal density of  $\sim 4.9 \times 10^{10} \text{ cm}^{-2}$ . The Au nanopillars are uniformly distributed in the BTO matrix and the nanopillar density can be easily tuned by controlling the composition of the composite Au-BTO target.

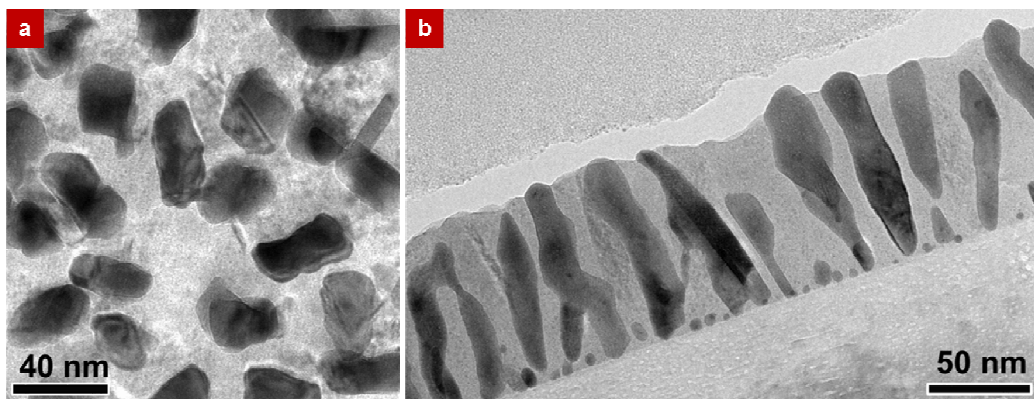

**Figure S3.** Plan-view (a) and cross-sectional (b) TEM images of Au-BTO thin film grown on *c*-cut  $\alpha$ -Al<sub>2</sub>O<sub>3</sub> substrate. The TEM images indicate that epitaxial Au nanopillars embedded in BTO matrix can also be fabricated on *c*-cut  $\alpha$ -Al<sub>2</sub>O<sub>3</sub> substrate.

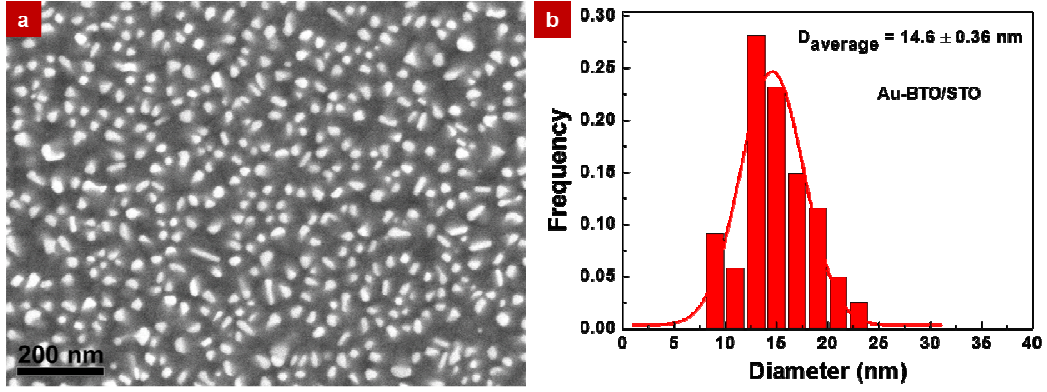

**Figure S4.** (a) A typical low magnification scanning electron microscopy (SEM) image of Au-BTO thin film grown on STO (001) substrate and (b) the statistical distribution of the nanopillar diameters from the corresponding SEM image. The low magnification SEM image from a large area indicates the uniformly distributed epitaxial Au nanopillars in BTO matrix. The statistical size distribution shows that the average diameter of Au nanopillars is at nanometer scale of around 15 nm. This clearly demonstrates the advantages of the pulsed laser deposition method for creating epitaxial Au nanopillars by one-step self-assembly direct growth.

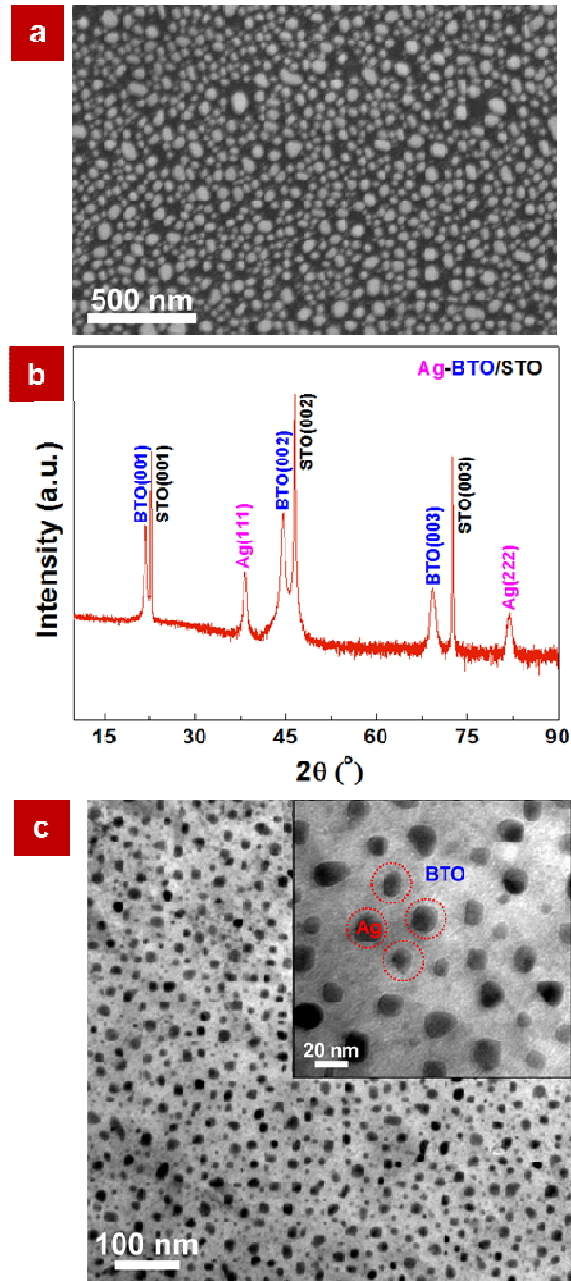

**Figure S5.** (a) SEM image of Au-ZnO nanocomposite VAN structure grown on *c*-cut  $\alpha$ -Al<sub>2</sub>O<sub>3</sub>, XRD pattern (b) and plan-view TEM image (c) of Ag-BTO nanocomposite demonstrating the potential and versatility of the metal-oxide nanocomposites for nanoscale metamaterial systems.

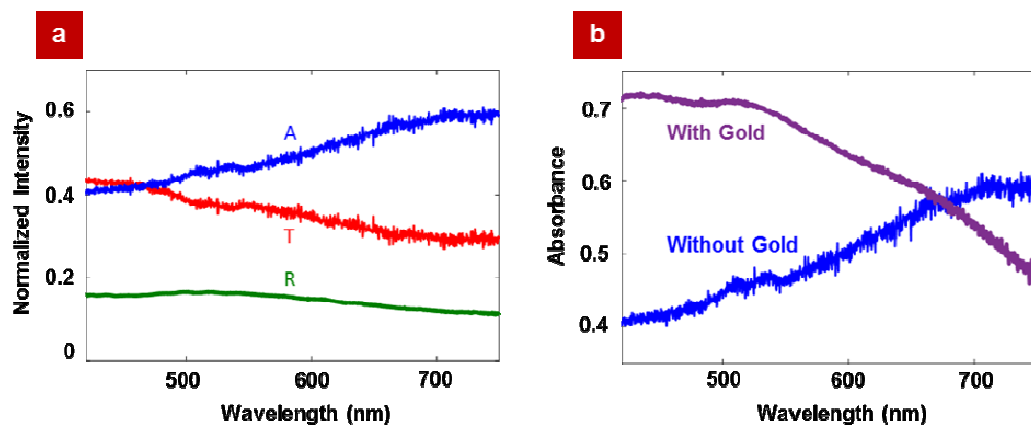

**Figure S6.** Experimental absorbance (blue), reflectance (green) and transmittance (red) spectra of a control 100 nm thick BTO film on a STO substrate (a) are compared with the absorbance (purple) of the equivalent VAN structure with Au pillars (b), as shown in Figure 4.
